# Supplementary material for: Hexameric poly-fluoroberyllophosphate Na4Be2PO4F5 with moderate birefringence and deep-ultraviolet transmission as a potential zero-order-waveplate crystal
Source: Royal Society of Chemistry journal article supplement (doi:10.1039/d2qi01469f), 2022-01-01
Supplement: d2qi01469f1.pdf [file d2qi01469f1.pdf]

## Supporting Information

Hexameric poly-fluoroberyllophosphate  $\text{Na}_4\text{Be}_2\text{PO}_4\text{F}_5$  with moderate birefringence and deep-ultraviolet transmission as potential zero-order-waveplate crystal

Yuanyu Yang,<sup>a</sup> Yao Guo,<sup>b</sup> Yi-Gang Chen,<sup>\*a</sup> Xiwei Hu,<sup>a</sup> Xia Zhang,<sup>a</sup> Xian-Ming Zhang,<sup>\*a,c</sup>

<sup>a</sup> Key Laboratory of Magnetic Molecules and Magnetic Information of Ministry of Education, School of Chemistry and Material Science, Shanxi Normal University, Taiyuan 030006, China.

<sup>b</sup> Henan Joint International Research Laboratory of Nanocomposite Sensing Materials, School of Materials Science and Engineering, Anyang Institute of Technology, Anyang 455000, China.

<sup>c</sup> College of Chemistry & Chemical Engineering, Key Laboratory of Interface Science and Engineering in Advanced Material, Ministry of Education, Taiyuan University of Technology, Yingze West, Taiyuan 030024, China.

## Table of Contents

**Table S1.** Selected bond lengths (Å) and angles (deg) for (a) Na<sub>4</sub>Be<sub>2</sub>PO<sub>4</sub>F<sub>5</sub> and (b) KBe[PO<sub>3</sub>(OH)]F.

**Table S2.** Atomic coordinates, equivalent isotropic displacement parameters (Å<sup>2</sup>), and the bond valence sum for each atom in the asymmetric unit of (a) Na<sub>4</sub>Be<sub>2</sub>PO<sub>4</sub>F<sub>5</sub> and (b) KBe[PO<sub>3</sub>(OH)]F.

**Table S3.** Energy-Dispersive Spectrometry (EDS) for (a) Na<sub>4</sub>Be<sub>2</sub>PO<sub>4</sub>F<sub>5</sub> and (b) KBe[PO<sub>3</sub>(OH)]F.

**Figure S1.** Photos of the crystals (a) Na<sub>4</sub>Be<sub>2</sub>PO<sub>4</sub>F<sub>5</sub> and (b) KBe[PO<sub>3</sub>(OH)]F.

**Figure S2.** Powder XRD patterns for (a) Na<sub>4</sub>Be<sub>2</sub>PO<sub>4</sub>F<sub>5</sub> and (b) KBe[PO<sub>3</sub>(OH)]F.

**Figure S3.** <sup>19</sup>F MAS NMR spectra of (a) Na<sub>4</sub>Be<sub>2</sub>PO<sub>4</sub>F<sub>5</sub> and (b) KBe[PO<sub>3</sub>(OH)]F.

**Figure S4.** Energy-Dispersive Spectrometry (EDS) for (a) Na<sub>4</sub>Be<sub>2</sub>PO<sub>4</sub>F<sub>5</sub> and (b) KBe[PO<sub>3</sub>(OH)]F.

**Figure S5.** TGA and DSC curves for (a) Na<sub>4</sub>Be<sub>2</sub>PO<sub>4</sub>F<sub>5</sub> and (b) KBe[PO<sub>3</sub>(OH)]F.

**Figure S6.** XRD patterns for (a) Na<sub>4</sub>Be<sub>2</sub>PO<sub>4</sub>F<sub>5</sub> after 570 °C and (a) KBe[PO<sub>3</sub>(OH)]F after 900 °C.

**Figure S7.** IR spectra of (a) Na<sub>4</sub>Be<sub>2</sub>PO<sub>4</sub>F<sub>5</sub> and (b) KBe[PO<sub>3</sub>(OH)]F.

**Figure S8.** Birefringence measurements of Na<sub>4</sub>Be<sub>2</sub>PO<sub>4</sub>F<sub>5</sub> (a) and KBe[PO<sub>3</sub>(OH)]F (b) crystal under a cross-polarizing microscope.

**Table S1.** Selected bond distances (Å) and angles (deg) for (a)Na<sub>4</sub>Be<sub>2</sub>PO<sub>4</sub>F<sub>5</sub> and (b) KBe[PO<sub>3</sub>(OH)]F.

| (a)         |             |             |             |
|-------------|-------------|-------------|-------------|
| Be(1)–O(3)  | 1.6120 (15) | Na(2)–F(5)  | 2.2622 (8)  |
| Be(1)–F(11) | 1.5519 (15) | Na(3)–O(3b) | 2.4561 (9)  |
| Be(1)–F(2)  | 1.5339 (15) | Na(3)–O(4j) | 2.2726 (9)  |
| Be(1)–F(5c) | 1.5719 (15) | Na(3)–F(1h) | 2.4350 (8)  |
| Be(2)–O(1)  | 1.6096 (15) | Na(3)–F(1)  | 2.2682 (8)  |
| Be(2)–O(2)  | 1.6506 (15) | Na(3)–F(3)  | 2.3838 (10) |
| Be(2)–F(3c) | 1.5464 (15) | Na(3)–F(4i) | 2.4604 (11) |
| Be(2)–F(4)  | 1.5596 (15) | Na(4)–O(2k) | 2.3886 (10) |
| P(1)–O(1c)  | 1.5361 (9)  | Na(4)–O(3)  | 2.4698 (12) |
| P(1)–O(2)   | 1.5500 (8)  | Na(4)–F(1c) | 2.5749 (9)  |
| P(1)–O(3)   | 1.5452 (8)  | Na(4)–F(3c) | 2.2281 (8)  |
| P(1)–O(4)   | 1.5079 (8)  | Na(4)–F(4k) | 2.6931 (8)  |
| Na(1)–O(4b) | 2.3578 (9)  | Na(4)–F(5l) | 2.2706 (8)  |
| Na(1)–O(4d) | 2.3578 (9)  | Na(4)–F(5c) | 2.6444 (9)  |
| Na(1)–F(2e) | 2.3101 (7)  | Na(5)–O(2f) | 2.5881 (10) |
| Na(1)–F(2)  | 2.3101 (7)  | Na(5)–O(2d) | 2.5881 (10) |
| Na(1)–F(4f) | 2.3048 (7)  | Na(5)–F(2)  | 2.3606 (8)  |
| Na(1)–F(4g) | 2.3048 (7)  | Na(5)–F(2c) | 2.3606 (8)  |
| Na(2)–O(1c) | 2.3789 (9)  | Na(5)–F(4d) | 2.6557 (10) |
| Na(2)–O(4b) | 2.3418 (10) | Na(5)–F(4f) | 2.6557 (10) |

|                   |             |                   |            |
|-------------------|-------------|-------------------|------------|
| Na(2)–F(1)        | 2.7835 (11) | Na(5)–F(5c)       | 2.4787 (9) |
| Na(2)–F(2)        | 2.2564 (10) | Na(5)–F(5)        | 2.4787 (9) |
| Na(2)–F(3)        | 2.3517 (8)  |                   |            |
| O(3)–Be(1)–F(11)  | 104.80 (8)  | O(4b)–Na(2)–F(1)  | 76.18 (3)  |
| O(1)–Be(2)–O(2)   | 113.10 (9)  | O(4j)–Na(3)–O(3b) | 144.39 (3) |
| O(1)–Be(2)–F(3c)  | 104.57 (9)  | O(3b)–Na(3)–F(4i) | 92.18 (3)  |
| O(1)–Be(2)–F(4)   | 115.89 (9)  | O(2k)–Na(4)–O(3)  | 125.38 (4) |
| O(1c)–P(1)–O(3)   | 108.69 (4)  | O(2k)–Na(4)–F(1c) | 102.76 (3) |
| O(3)–P(1)–O(2)    | 108.65 (5)  | O(2f)–Na(5)–O(2d) | 81.11 (4)  |
| O(4d)–Na(1)–O(4b) | 180.0       | O(2d)–Na(5)–F(4f) | 91.31 (3)  |

---

Symmetry transformations used to generate equivalent atoms:

(a)  $x, y-1, z$ ; (b)  $-x+1, -y+2, -z+1$ ; (c)  $-x+1, y, -z+1/2$ ; (d)  $x, y+1, z$ ; (e)  $-x+1, -y+3, -z+1$ ;  
(f)  $-x+1, y+1, -z+1/2$ ; (g)  $x, -y+2, z+1/2$ ; (h)  $-x+3/2, y-1/2, -z+3/2$ ; (i)  $x+1/2, y+1/2, z+1$ ;  
(j)  $x+1/2, -y+3/2, z+1/2$ ; (k)  $-x+1/2, -y+3/2, -z$ ; (l)  $x-1/2, -y+5/2, z-1/2$ ; (m)  $-x+1/2, -y+5/2, -z$ ;  
(n)  $-x+3/2, y+1/2, -z+3/2$ ; (o)  $x+1/2, -y+5/2, z+1/2$ ; (p)  $-x+1, y-1, -z+1/2$ ; (q)  $x-1/2, y-1/2, z-1$ ;  
(r)  $x-1/2, -y+3/2, z-1/2$ .

**(b)**

---

|            |             |            |             |
|------------|-------------|------------|-------------|
| Be(1)–O(7) | 1.634 (2)   | K(1)–O(1c) | 2.7364 (13) |
| Be(1)–O(6) | 1.626 (2)   | K(1)–O(2)  | 2.7642 (13) |
| Be(1)–O(3) | 1.626 (2)   | K(1)–O(3e) | 2.9253 (12) |
| Be(1)–F(2) | 1.541 (2)   | K(1)–O(5b) | 2.7591 (12) |
| P(1)–O(1)  | 1.5745 (13) | K(1)–O(6d) | 2.9663 (13) |
| P(1)–O(3h) | 1.5280 (13) | K(1)–O(8b) | 2.8648 (12) |
| P(1)–O(6g) | 1.5177 (11) | K(1)–F(1c) | 2.6268 (10) |

|                  |             |                  |             |
|------------------|-------------|------------------|-------------|
| P(1)–O(8)        | 1.5174 (12) | K(1)–F(2)        | 2.7921 (11) |
| Be(2h)–O(4)      | 1.633 (2)   | K(2)–O(1a)       | 2.9518 (14) |
| Be(2)–O(5)       | 1.632 (2)   | K(2)–O(2e)       | 2.8552 (13) |
| Be(2)–O(8)       | 1.638 (2)   | K(2)–O(3e)       | 3.0155 (12) |
| Be(2)–F(1)       | 1.529 (2)   | K(2)–O(5)        | 3.1588 (13) |
| P(2)–O(2)        | 1.5734 (13) | K(2)–O(6c)       | 3.2165 (12) |
| P(2)–O(4)        | 1.5314 (13) | K(2)–O(7c)       | 2.7851 (12) |
| P(2)–O(5)        | 1.5138 (11) | K(2)–O(8)        | 3.3385 (12) |
| P(2)–O(7)        | 1.5098 (11) | K(2)–F(1c)       | 2.7633 (11) |
| O(1)–H(1)        | 0.68 (2)    | K(2)–F(1)        | 2.7476 (11) |
| O(2)–H(2)        | 0.82 (3)    | K(2)–F(2c)       | 3.4069 (11) |
| O(3)–Be(1)–O(7)  | 111.38 (14) | O(4h)–Be(2)–O(8) | 111.27 (14) |
| O(3)–Be(1)–F(2)  | 109.56 (14) | O(8)–Be(2)–F(1)  | 111.15 (14) |
| O(3h)–P(1)–O(1)  | 105.93 (7)  | O(4)–P(2)–O(2)   | 106.22 (7)  |
| O(6g)–P(1)–O(1)  | 107.73 (7)  | O(1a)–K(2)–O(3e) | 49.03 (3)   |
| O(1c)–K(1)–O(2)  | 150.53 (4)  | O(1a)–K(2)–O(5)  | 129.50 (3)  |
| O(1c)–K(1)–O(5b) | 84.37 (4)   | O(1a)–K(2)–F(2c) | 115.31 (3)  |
| O(2)–K(1)–F(2)   | 71.93 (3)   | O(2e)–K(2)–F(2c) | 99.99 (3)   |
| O(5b)–K(1)–F(2)  | 70.04 (3)   | O(3e)–K(2)–F(2c) | 157.41 (3)  |

---

Symmetry codes: (a)  $x+1/2, -y+1/2, z-1/2$ ; (b)  $-x+1/2, y+1/2, -z+1/2$ ; (c)  $-x+1, -y+1, -z+1$ ; (d)  $x+1/2, -y+3/2, z-1/2$ ; (e)  $-x+1/2, y-1/2, -z+1/2$ ; (f)  $x-1/2, -y+1/2, z+1/2$ ; (g)  $x, y-1, z$ ; (h)  $-x, -y+1, -z+1$ ; (i)  $x-1/2, -y+3/2, z+1/2$ ; (j)  $x, y+1, z$ .

**Table S2.** Atomic coordinates, equivalent isotropic displacement parameters ( $\text{\AA}^2$ ) for (a)  $\text{Na}_4\text{Be}_2\text{PO}_4\text{F}_5$  and (b)  $\text{KBe}[\text{PO}_3(\text{OH})]\text{F}$ .  $U(\text{eq})$  is defined as one-third of the trace of the orthogonalized  $U_{ij}$  tensor.

**(a)**

| Atom | Wyck. | Site | x/a        | y/b         | z/c         | BVS  |
|------|-------|------|------------|-------------|-------------|------|
| P1   | 8f    | 1    | 0.40923(2) | 0.82091(3)  | 0.27680(2)  | 5.00 |
| Be1  | 8f    | 1    | 0.36665(9) | 1.20614(18) | 0.22229(13) | 1.98 |
| Be2  | 8f    | 1    | 0.39721(9) | 0.76191(18) | 0.05890(13) | 1.98 |
| Na1  | 4a    | -1   | 1/2        | 1.50000     | 1/2         | 1.16 |
| Na2  | 8f    | 1    | 0.59347(3) | 1.14243(6)  | 0.49146(4)  | 1.06 |
| Na3  | 8f    | 1    | 0.77023(3) | 0.96832(6)  | 0.77727(4)  | 1.05 |
| Na4  | 8f    | 1    | 0.23233(3) | 1.00435(6)  | -0.02314(4) | 1.02 |
| Na5  | 4e    | 2    | 1/2        | 1.44808(9)  | 1/4         | 0.94 |
| O1   | 8f    | 1    | 0.48885(5) | 0.87466(10) | 0.12516(7)  | 1.97 |
| O2   | 8f    | 1    | 0.38671(5) | 0.71226(11) | 0.16311(7)  | 1.98 |
| O3   | 8f    | 1    | 0.35017(5) | 0.99343(10) | 0.21939(8)  | 2.04 |
| O4   | 8f    | 1    | 0.38760(5) | 0.71072(11) | 0.34321(7)  | 1.98 |
| F1   | 8f    | 1    | 0.78190(4) | 1.20409(9)  | 0.68668(7)  | 0.98 |
| F2   | 8f    | 1    | 0.45753(4) | 1.28672(9)  | 0.34678(6)  | 1.04 |
| F3   | 8f    | 1    | 0.68233(4) | 0.88235(9)  | 0.55471(6)  | 1.02 |
| F4   | 8f    | 1    | 0.39072(4) | 0.57208(9)  | 0.00581(6)  | 0.96 |
| F5   | 8f    | 1    | 0.63796(5) | 1.25309(9)  | 0.39172(6)  | 1.04 |

| Atom | $U_{11}$    | $U_{22}$    | $U_{33}$    | $U_{12}$    | $U_{13}$    | $U_{23}$     |
|------|-------------|-------------|-------------|-------------|-------------|--------------|
| P1   | 0.00859(13) | 0.00772(13) | 0.00897(13) | 0.00029(8)  | 0.00626(11) | 0.00011(8)   |
| Be1  | 0.0132(6)   | 0.0105(6)   | 0.0130(6)   | 0.0002(4)   | 0.0092(5)   | -0.0003(4)   |
| Be2  | 0.0107(5)   | 0.0113(6)   | 0.0124(6)   | 0.0002(4)   | 0.0082(5)   | -0.0001(4)   |
| Na1  | 0.0152(3)   | 0.0147(3)   | 0.0149(3)   | 0.0024(2)   | 0.0108(2)   | 0.0016(2)    |
| Na2  | 0.0219(2)   | 0.0173(2)   | 0.0177(2)   | 0.00361(17) | 0.0144(2)   | 0.00074(17)  |
| Na3  | 0.0168(2)   | 0.0183(2)   | 0.0192(2)   | 0.00239(16) | 0.01320(19) | 0.00354(17)  |
| Na4  | 0.0161(2)   | 0.0191(2)   | 0.0192(2)   | 0.00063(17) | 0.0102(2)   | -0.00178(17) |
| Na5  | 0.0208(3)   | 0.0166(3)   | 0.0265(3)   | 0.00000     | 0.0174(3)   | 0.00000      |
| O1   | 0.0102(3)   | 0.0141(4)   | 0.0147(4)   | 0.0001(3)   | 0.0078(3)   | 0.0024(3)    |
| O2   | 0.0170(4)   | 0.0162(4)   | 0.0144(3)   | -0.0049(3)  | 0.0125(3)   | -0.0047(3)   |
| O3   | 0.0114(3)   | 0.0094(4)   | 0.0199(4)   | 0.0015(3)   | 0.0086(3)   | 0.0018(3)    |
| O4   | 0.0163(4)   | 0.0156(4)   | 0.0142(4)   | -0.0010(3)  | 0.0118(3)   | 0.0017(3)    |
| F1   | 0.0186(3)   | 0.0151(3)   | 0.0236(3)   | -0.0048(2)  | 0.0158(3)   | -0.0022(2)   |
| F2   | 0.0158(3)   | 0.0159(3)   | 0.0154(3)   | -0.0028(2)  | 0.0077(3)   | -0.0037(2)   |
| F3   | 0.0118(3)   | 0.0181(3)   | 0.0146(3)   | -0.0034(2)  | 0.0066(3)   | -0.0035(2)   |
| F4   | 0.0232(3)   | 0.0138(3)   | 0.0216(3)   | -0.0011(2)  | 0.0175(3)   | -0.0039(2)   |
| F5   | 0.0234(3)   | 0.0205(3)   | 0.0186(3)   | -0.0034(3)  | 0.0169(3)   | -0.0033(3)   |

**(b)**

| Atom | Wyck. | Site | x/a          | y/b         | z/c         | BVS  |
|------|-------|------|--------------|-------------|-------------|------|
| P1   | 4e    | 1    | 0.16300(5)   | 0.08053(4)  | 0.60944(4)  | 5.01 |
| P2   | 4e    | 1    | 0.10578(5)   | 0.57972(4)  | 0.37624(4)  | 5.04 |
| Be1  | 4e    | 1    | 0.1815(3)    | 0.8614(2)   | 0.43811(19) | 2.03 |
| Be2  | 4e    | 1    | 0.2115(3)    | 0.3638(2)   | 0.54256(19) | 2.02 |
| K1   | 4e    | 1    | 0.47035(5)   | 0.70855(4)  | 0.21330(3)  | 1.03 |
| K2   | 4e    | 1    | 0.52610(5)   | 0.31339(5)  | 0.39494(4)  | 0.89 |
| F1   | 4e    | 1    | 0.38493(12)  | 0.40709(10) | 0.59238(9)  | 0.96 |
| F2   | 4e    | 1    | 0.33227(13)  | 0.89187(11) | 0.36955(9)  | 0.74 |
| O1   | 4e    | 1    | 0.27211(16)  | 0.11254(13) | 0.72939(11) | 2.13 |
| O2   | 4e    | 1    | 0.15963(16)  | 0.61113(13) | 0.24831(11) | 2.16 |
| O3   | 4e    | 1    | 0.01535(14)  | 0.91488(12) | 0.35996(10) | 2.01 |
| O4   | 4e    | 1    | -0.08263(14) | 0.58385(12) | 0.36413(10) | 1.78 |
| O5   | 4e    | 1    | 0.16891(15)  | 0.43485(11) | 0.41129(10) | 2.06 |
| O6   | 4e    | 1    | 0.20649(15)  | 0.93443(11) | 0.56919(10) | 2.02 |
| O7   | 4e    | 1    | 0.17771(14)  | 0.69220(11) | 0.46006(10) | 2.01 |
| O8   | 4e    | 1    | 0.19944(15)  | 0.19409(12) | 0.52125(10) | 1.98 |
| H1   | 4e    | 1    | 0.298(3)     | 0.052(2)    | 0.757(2)    | 0.89 |
| H2   | 4e    | 1    | 0.150(4)     | 0.539(3)    | 0.208(3)    | 0.78 |

| Atom | U <sub>11</sub> | U <sub>22</sub> | U <sub>33</sub> | U <sub>12</sub> | U <sub>13</sub> | U <sub>23</sub> |
|------|-----------------|-----------------|-----------------|-----------------|-----------------|-----------------|
| K1   | 0.0172(2)       | 0.01511(19)     | 0.0189(2)       | 0.00067(15)     | -0.00182(15)    | 0.00036(15)     |
| P1   | 0.0125(2)       | 0.00720(19)     | 0.0095(2)       | 0.00022(16)     | -0.00092(16)    | 0.00033(16)     |
| K2   | 0.0232(2)       | 0.0314(2)       | 0.0229(2)       | -0.00468(19)    | 0.00110(17)     | -0.00498(18)    |
| P2   | 0.0119(2)       | 0.00711(19)     | 0.0088(2)       | -0.00006(16)    | 0.00080(16)     | 0.00007(16)     |
| F1   | 0.0133(5)       | 0.0200(5)       | 0.0199(5)       | -0.0014(4)      | -0.0024(4)      | 0.0006(4)       |
| F2   | 0.0185(5)       | 0.0199(5)       | 0.0235(5)       | 0.0011(4)       | 0.0086(4)       | 0.0040(4)       |
| O8   | 0.0204(7)       | 0.0095(6)       | 0.0124(6)       | 0.0012(5)       | 0.0013(5)       | 0.0012(5)       |
| O7   | 0.0168(6)       | 0.0090(5)       | 0.0143(6)       | -0.0004(5)      | -0.0026(5)      | -0.0008(5)      |
| O6   | 0.0227(7)       | 0.0087(5)       | 0.0119(6)       | 0.0021(5)       | -0.0019(5)      | -0.0004(5)      |
| O5   | 0.0245(7)       | 0.0077(5)       | 0.0117(6)       | 0.0016(5)       | -0.0002(5)      | 0.0008(5)       |
| O4   | 0.0117(6)       | 0.0165(6)       | 0.0158(6)       | -0.0008(5)      | 0.0008(5)       | -0.0054(5)      |
| O2   | 0.0215(7)       | 0.0124(6)       | 0.0126(6)       | 0.0006(5)       | 0.0057(5)       | 0.0017(5)       |
| O1   | 0.0192(7)       | 0.0107(6)       | 0.0136(6)       | -0.0003(5)      | -0.0059(5)      | 0.0017(5)       |
| O3   | 0.0136(6)       | 0.0159(6)       | 0.0162(6)       | 0.0012(5)       | 0.0003(5)       | 0.0035(5)       |
| Be1  | 0.0158(11)      | 0.0097(10)      | 0.0099(10)      | -0.0006(8)      | -0.0001(8)      | -0.0001(8)      |
| Be2  | 0.0143(11)      | 0.0094(10)      | 0.0114(10)      | 0.0001(8)       | -0.0005(8)      | 0.0004(8)       |

**Table S3.** Energy-Dispersive Spectrometry (EDS) for Na<sub>4</sub>Be<sub>2</sub>PO<sub>4</sub>F<sub>5</sub> and KBe[PO<sub>3</sub>(OH)]F.

**(a)**

| Point 1 |         |         |         | Point 2                                        |         |         |         |
|---------|---------|---------|---------|------------------------------------------------|---------|---------|---------|
| Element | Weight% | Atomic% | Formula | Element                                        | Weight% | Atomic% | Formula |
| O K     | 23.10   | 28.95   |         | O K                                            | 24.02   | 30.08   |         |
| F K     | 36.90   | 34.96   | 5.27    | F K                                            | 33.87   | 35.72   | 4.95    |
| Na M    | 31.15   | 27.17   | 4.45    | Na M                                           | 30.96   | 26.98   | 3.74    |
| P M     | 6.98    | 10.78   | 1       | P M                                            | 11.15   | 7.21    | 1       |
| Totals  | 100.00  |         |         | Totals                                         | 100.00  |         |         |
| Point 3 |         |         |         | The average Na:P:F molar ratio:<br>4.16:1:5.08 |         |         |         |
| Element | Weight% | Atomic% | Formula |                                                |         |         |         |
| O K     | 28.95   | 35.72   |         |                                                |         |         |         |
| F K     | 30.13   | 31.30   | 5.02    |                                                |         |         |         |
| Na M    | 31.15   | 26.75   | 4.29    |                                                |         |         |         |
| P M     | 9.77    | 6.23    | 1       |                                                |         |         |         |
| Totals  | 100.00  |         |         |                                                |         |         |         |

**(b)**

| Point 1 |         |         |         | Point 2                                       |         |         |         |
|---------|---------|---------|---------|-----------------------------------------------|---------|---------|---------|
| Element | Weight% | Atomic% | Formula | Element                                       | Weight% | Atomic% | Formula |
| O K     | 3.41    | 54.37   |         | O K                                           | 43.02   | 58.29   |         |
| F K     | 4.94    | 15.93   | 1.15    | F K                                           | 11.81   | 13.47   | 1.04    |
| KK      | 1.79    | 13.80   | 1       | KK                                            | 23.23   | 12.88   | 1       |
| P K     | 1.65    | 15.90   | 1.15    | P K                                           | 21.93   | 15.35   | 1.19    |
| Totals  | 100.00  |         |         | Totals                                        | 100.00  |         |         |
| Point 3 |         |         |         | The average K:P:F molar ratio:<br>1:1.15:1.09 |         |         |         |
| Element | Weight% | Atomic% | Formula |                                               |         |         |         |
| O K     | 57.13   | 69.78   |         |                                               |         |         |         |
| F K     | 10.23   | 10.29   | 1.08    |                                               |         |         |         |
| KK      | 19.52   | 9.46    | 1       |                                               |         |         |         |
| P K     | 15.28   | 10.47   | 1.11    |                                               |         |         |         |
| Totals  | 100.00  |         |         |                                               |         |         |         |



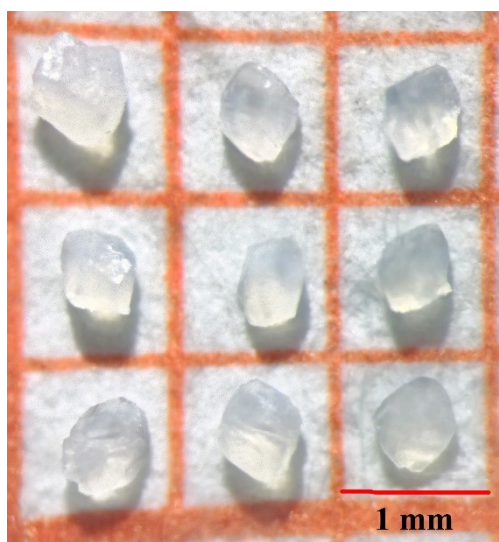

(a)

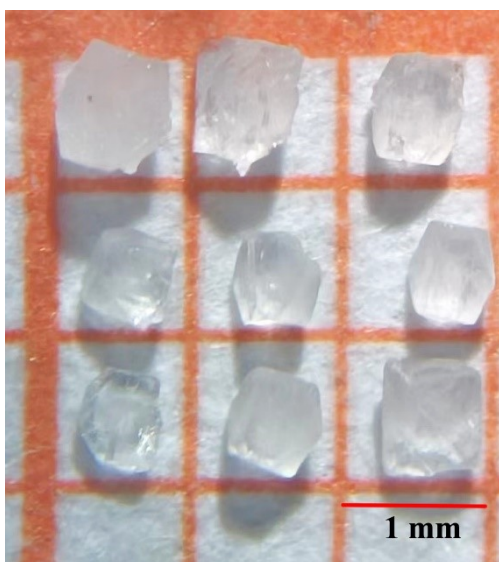

(b)

**Figure S1.** Photos of the crystals (a)  $\text{Na}_4\text{Be}_2\text{PO}_4\text{F}_5$  and (b)  $\text{KBe}[\text{PO}_3(\text{OH})]\text{F}$ .

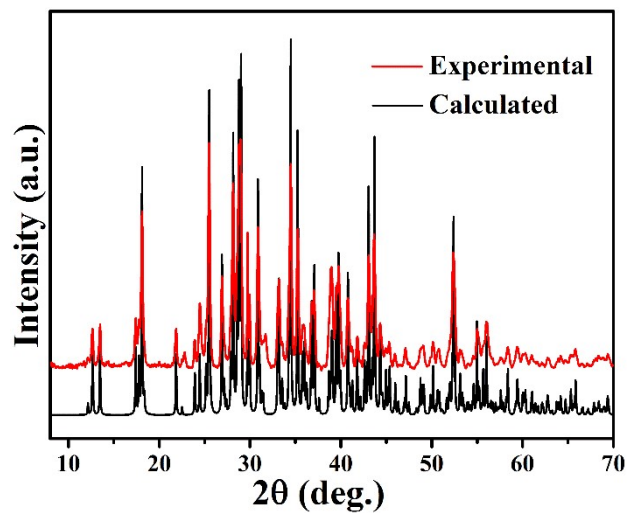

(a)

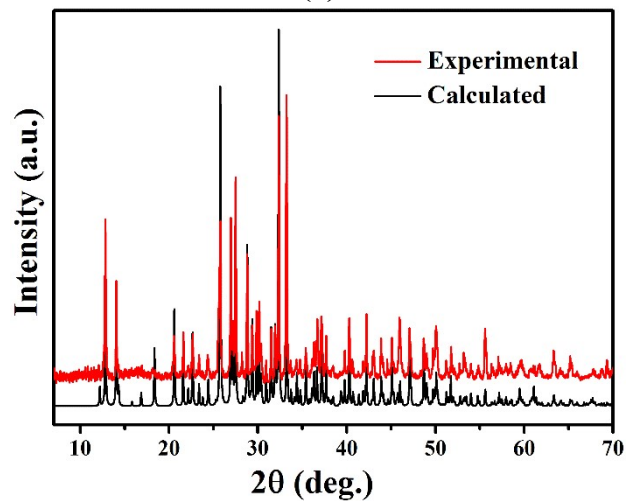

(b)

Figure S2. Powder XRD patterns for (a)  $\text{Na}_4\text{Be}_2\text{PO}_4\text{F}_5$  and (b)  $\text{KBe}[\text{PO}_3(\text{OH})]\text{F}$ .

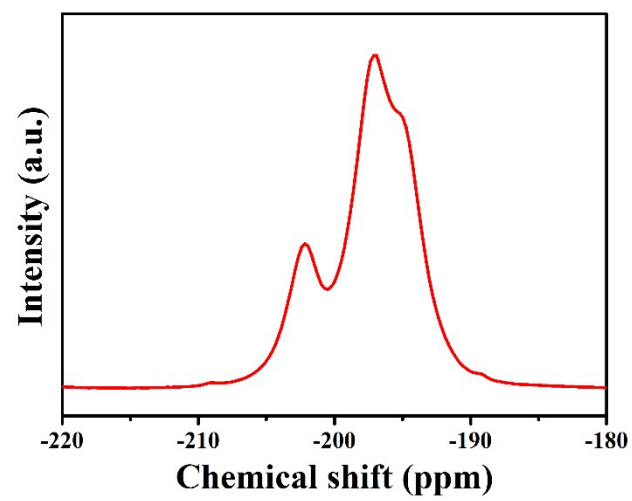

(a)

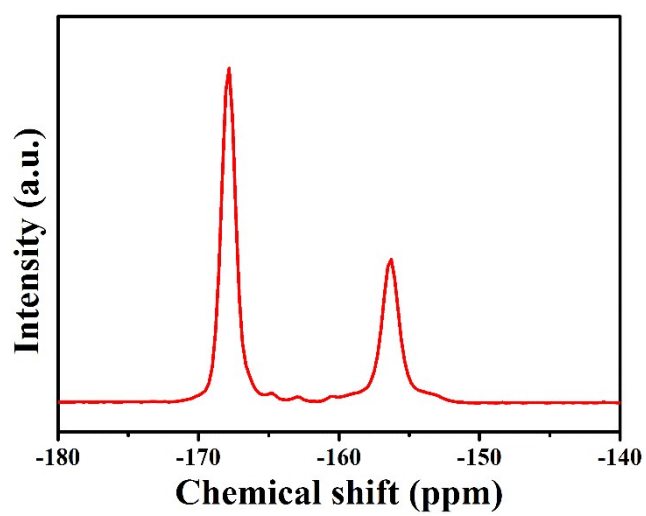

(b)

**Figure S3.**  $^{19}\text{F}$  MAS NMR spectra of (a)  $\text{Na}_4\text{Be}_2\text{PO}_4\text{F}_5$  and (b)  $\text{KBe}[\text{PO}_3(\text{OH})]\text{F}$ .

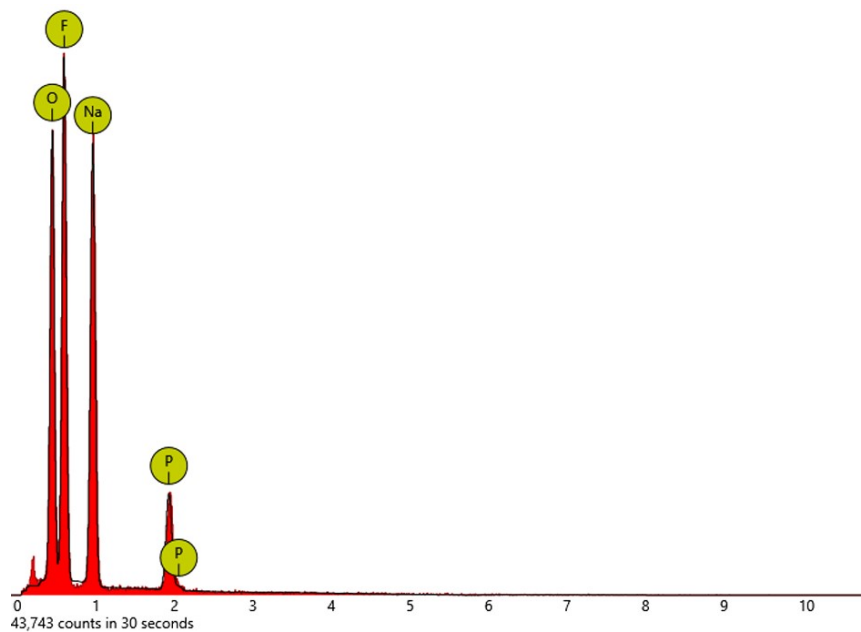

(a)

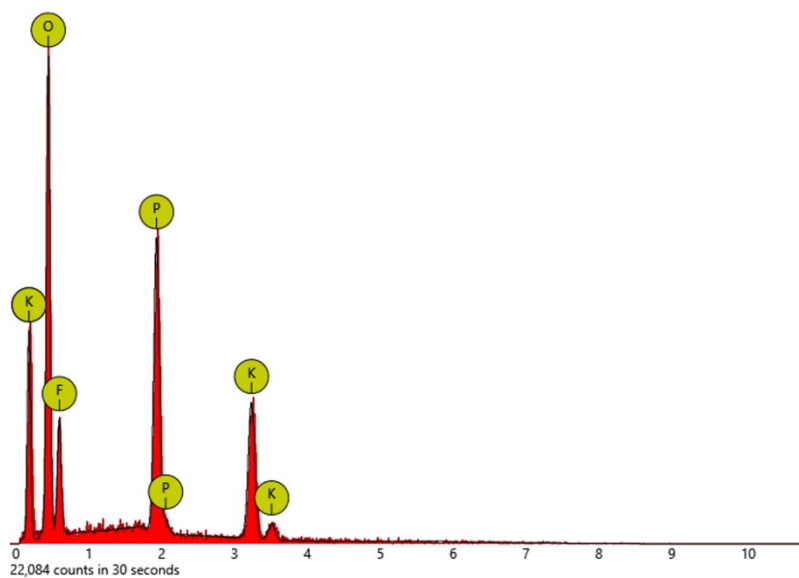

(b)

**Figure S4.** Energy-Dispersive Spectrometry (EDS) for (a)  $\text{Na}_4\text{Be}_2\text{PO}_4\text{F}_5$  and (b)  $\text{KBe}[\text{PO}_3(\text{OH})]\text{F}$ .

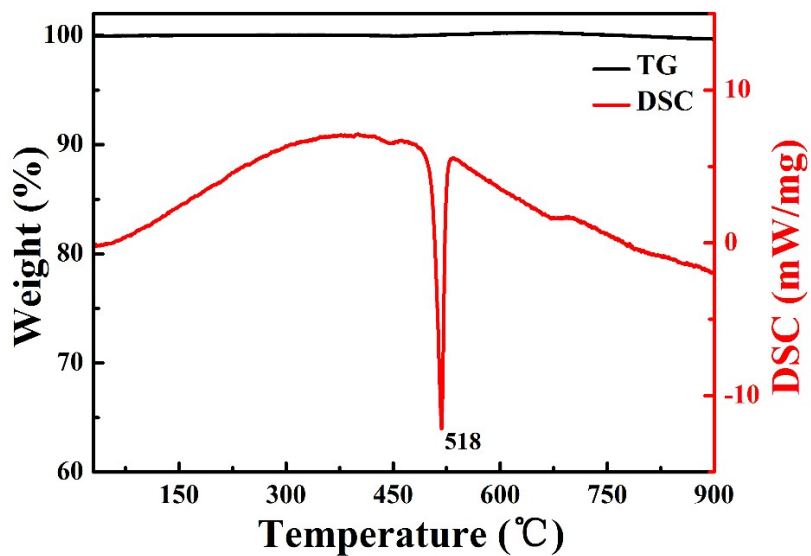

(a)

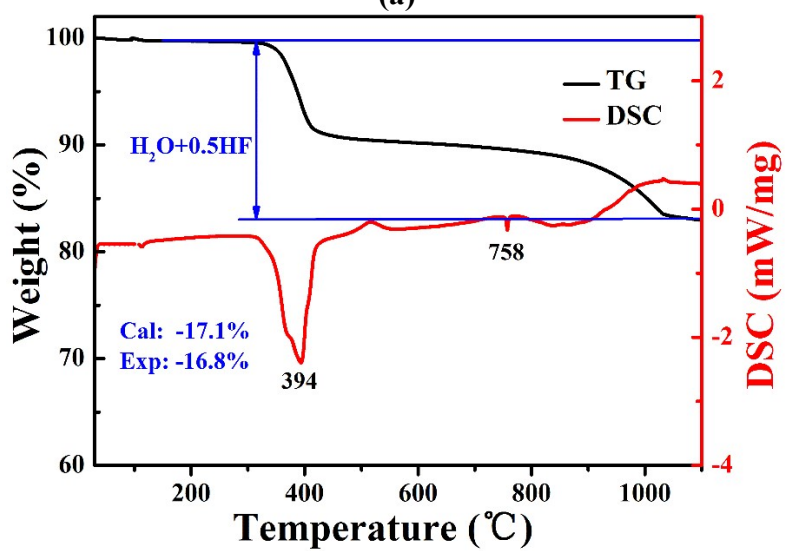

(b)

Figure S5. TG and DSC curves for (a)  $\text{Na}_4\text{Be}_2\text{PO}_4\text{F}_5$  and (b)  $\text{KBe}[\text{PO}_3(\text{OH})]\text{F}$ .

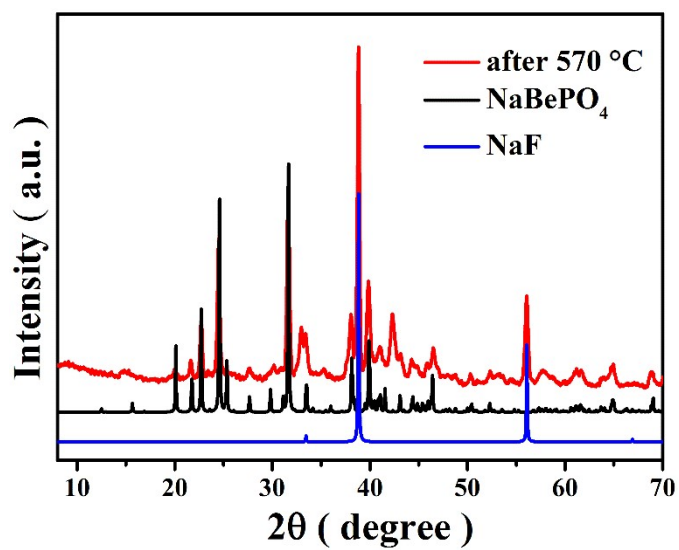

(a)

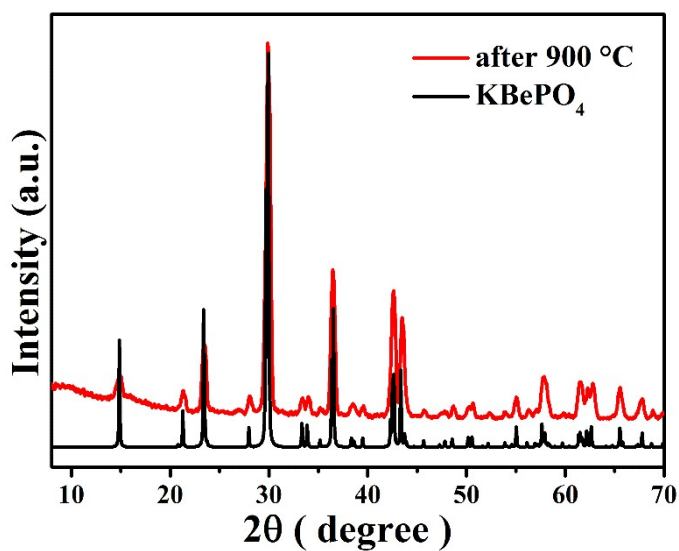

(b)

**Figure S6.** XRD patterns for (a)  $\text{Na}_4\text{Be}_2\text{PO}_4\text{F}_5$  after 570 °C and (b)  $\text{KBe}[\text{PO}_3(\text{OH})]\text{F}$  after 900 °C.

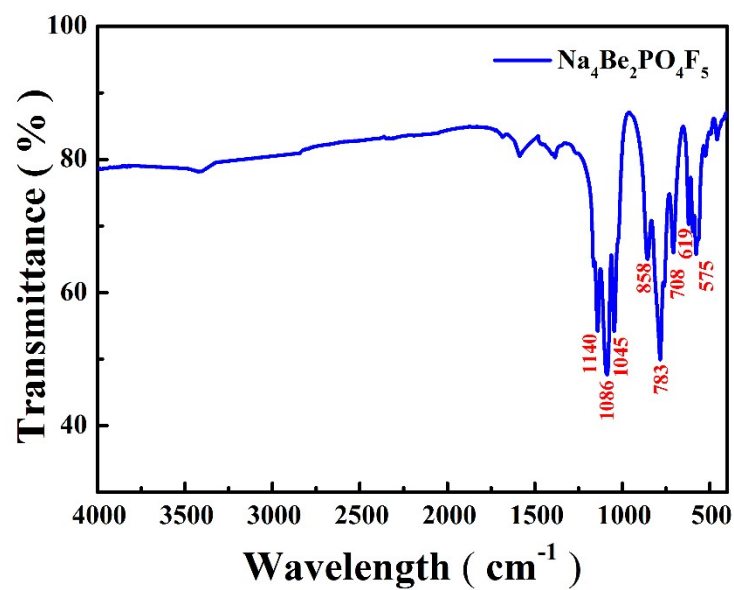

(a)

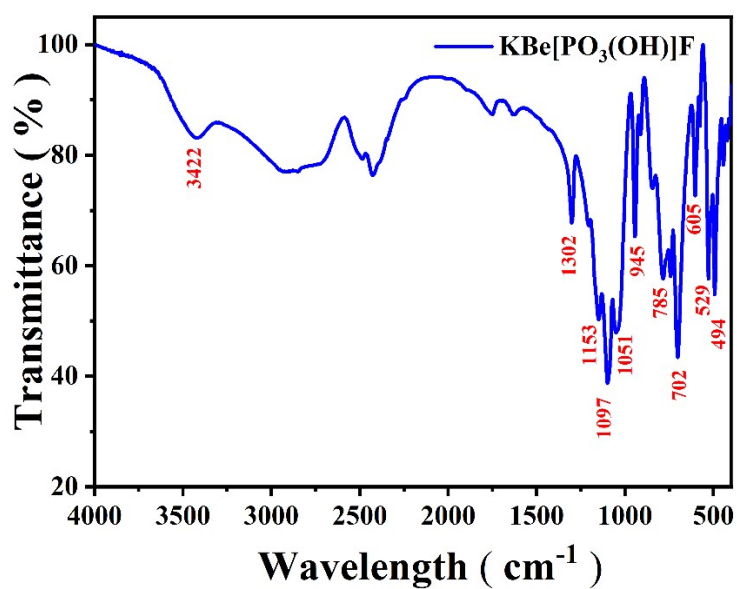

(b)

**Figure S7.** IR spectra of (a)  $\text{Na}_4\text{Be}_2\text{PO}_4\text{F}_5$  and (b)  $\text{KBe}[\text{PO}_3(\text{OH})]\text{F}$ .

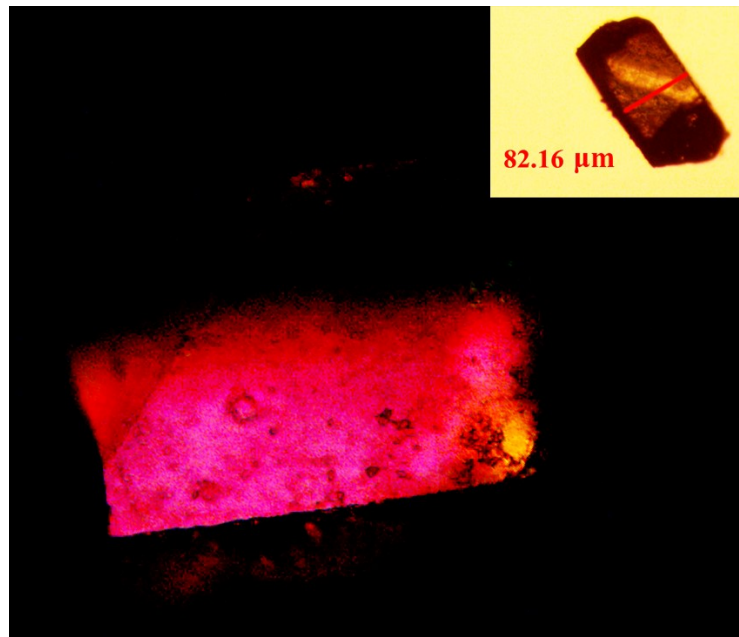

(a)

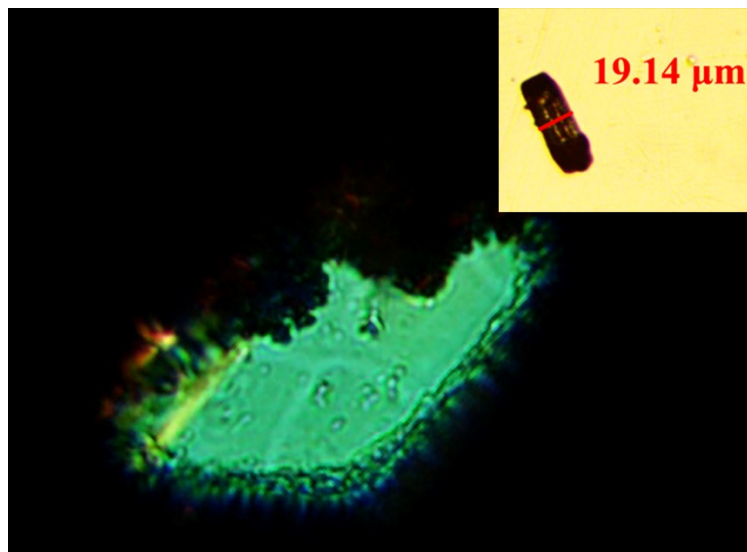

(b)

**Figure S8.** Birefringence measurements of Na<sub>4</sub>Be<sub>2</sub>PO<sub>4</sub>F<sub>5</sub> (a) and KBe[PO<sub>3</sub>(OH)]F(b) crystal under a cross-polarizing microscope. Na<sub>4</sub>Be<sub>2</sub>PO<sub>4</sub>F<sub>5</sub> and KBe[PO<sub>3</sub>(OH)]F have the thicknesses of 82.16 and 19.14 μm, respectively. Optical path differences of two tested crystal are about 540 and 710 nm, with the first-order pink and second-order green, respectively, according to Michal–Levy diagram.
